# Supplementary material for: Optimization of solution-processed amorphous cadmium gallium oxide for high-performance thin-film transistors
Source: Royal Society of Chemistry journal article supplement (doi:10.1039/d3tc01131c), 2023-01-01
Supplement: d3tc01131c1.pdf [file d3tc01131c1.pdf]

Electronic Supplementary Information

**Optimization of solution-processed amorphous cadmium gallium oxide for high-performance thin-film transistors**

*Minh Nhut Le<sup>a</sup>, Paul Lee<sup>a</sup>, Seung-Han Kang<sup>b</sup>, Kyunghan Ahn<sup>a</sup>, Sung Kyu Park<sup>b</sup>, Jaesang Heo<sup>a\*</sup>,  
and Myung-Gil Kim<sup>a\*</sup>*

<sup>a</sup>School of Advanced Materials Science and Engineering, Sungkyunkwan University

2066 Seobu-ro, Jangan-gu, Suwon-si, Gyeonggi-do 16419, Republic of Korea

<sup>b</sup>School of Electrical and Electronics Engineering, Chung-Ang University

84 Heukseok-ro, Dongjak-gu, Seoul 06974, Republic of Korea

Email of corresponding (\*) authors: myunggil@skku.edu and heojs38@gmail.com

**Table S1.** Electrical performances of optimized  $\alpha$ -Cd<sub>5.5</sub>Ga<sub>4.5</sub>O<sub>12.25</sub> TFT annealed at 500 °C :Comparison before and after 7 days exposure to ambient air.

|                                             | <b>Mobility (</b><br>$cm^2V^{-1}s^{-1}$ <b>)</b> | $V_{on}$<br><b>(V)</b> | $V_{th}$<br><b>(V)</b> | <b>SS</b><br><b>(V/dec)</b> |
|---------------------------------------------|--------------------------------------------------|------------------------|------------------------|-----------------------------|
| <b>Initial</b>                              | 11.9                                             | -5                     | 4.49                   | 1.71                        |
| <b>One week exposure<br/>to ambient air</b> | 12.15                                            | -8                     | 3.41                   | 1.31                        |

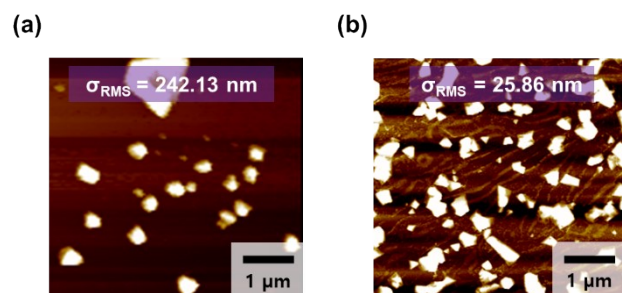

**Figure S1.** Atomic force microscopy (AFM) images of CdO thin-films annealed at (a) 500°C and (b) 350 °C.

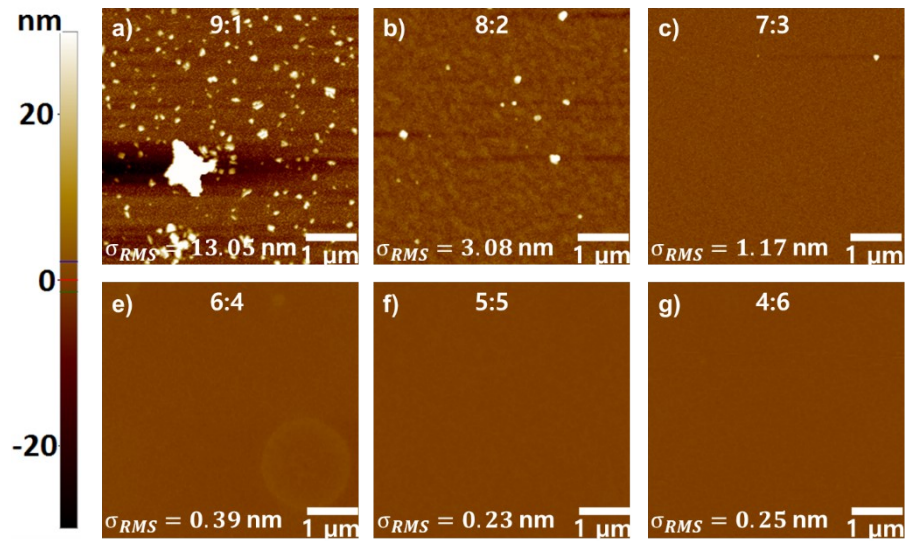

**Figure S2.** AFM images of CdGaO thin films annealed at 500 °C with Cd:Ga ratios of a) 9:1, b) 8:2, c) 7:3, d) 6:4, e) 5:5, and f) 4:6.

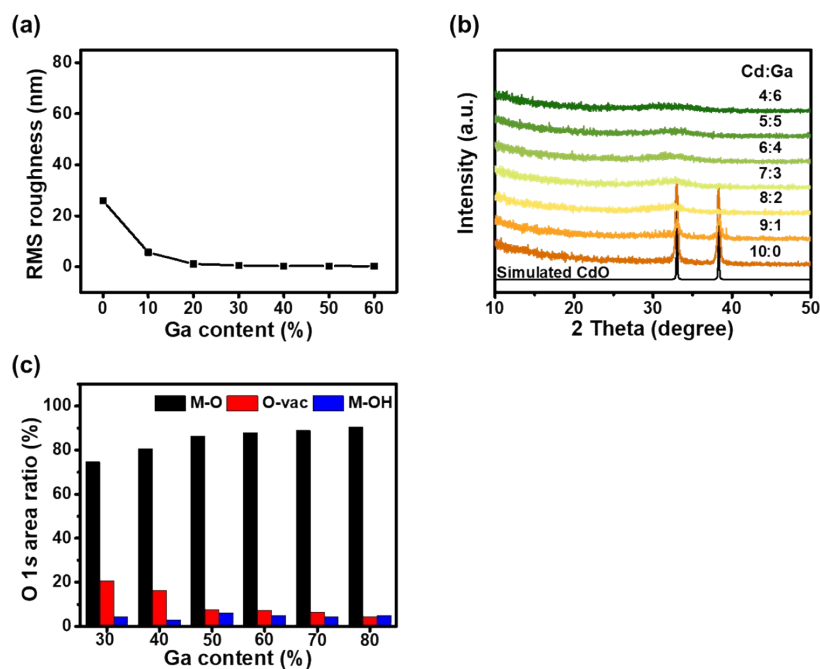

**Figure S3.** a) Root mean square surface roughness data for CdGaO films with Cd:Ga ratios ranging from 10:0 to 4:6, annealed at 350 °C. b) XRD patterns of CdGaO thin films with Cd:Ga ratios ranging from 10:0 to 4:6, annealed at 350 °C. c) Areal ratios of M–O–M, M–O<sub>vac</sub>, and M–OH bonding states obtained from O 1s XPS profiles of *a*-CdGaO thin films with Cd:Ga ratios ranging from 7:3 to 2:8, annealed at 350 °C, after surface sputtering.

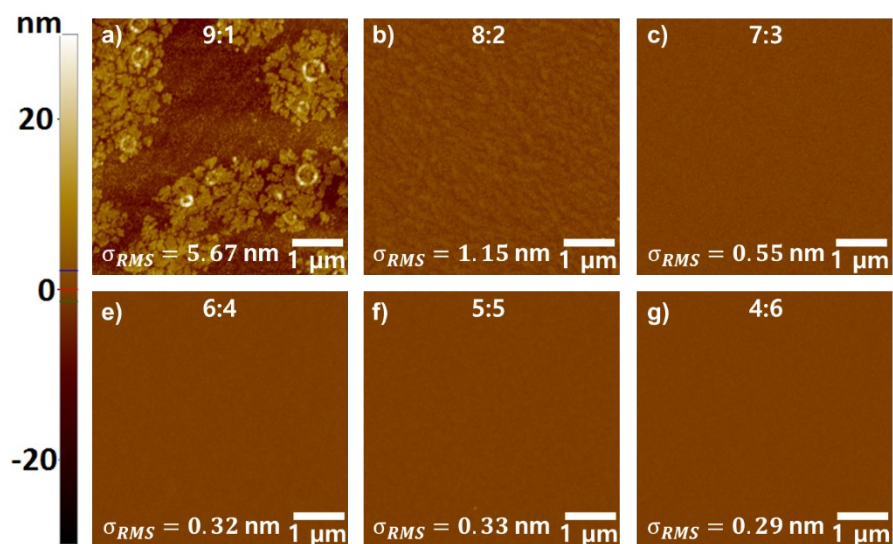

**Figure S4.** AFM images of CdGaO thin films annealed at 350 °C with Cd:Ga ratios of a) 9:1, b) 8:2, c) 7:3, d) 6:4, e) 5:5, and f) 4:6.

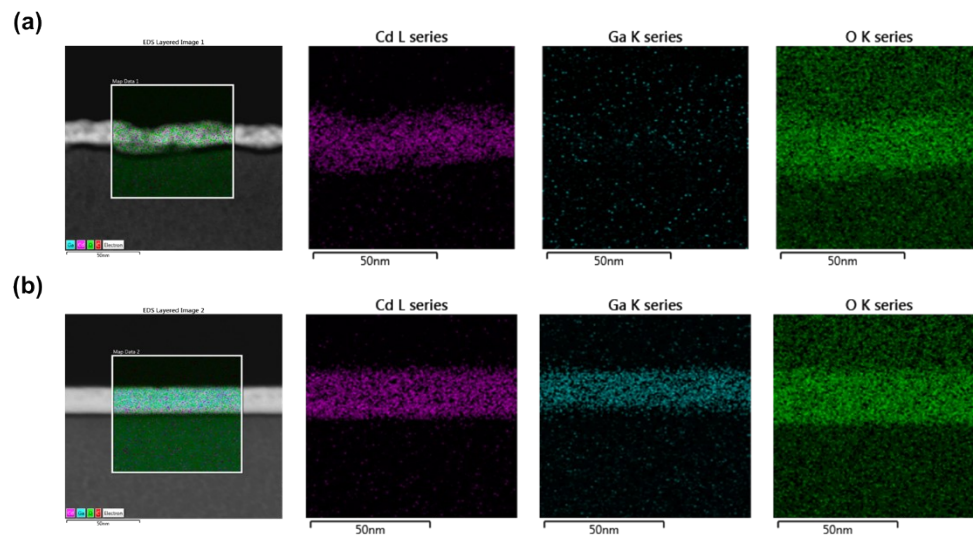

**Figure S5.** Energy-dispersive X-ray spectroscopy (EDS) mapping image of a) CdO thin-film and b) optimized  $\alpha$ -Cd<sub>5.5</sub>Ga<sub>4.5</sub>O<sub>12.25</sub> thin-film annealed at 500°C.

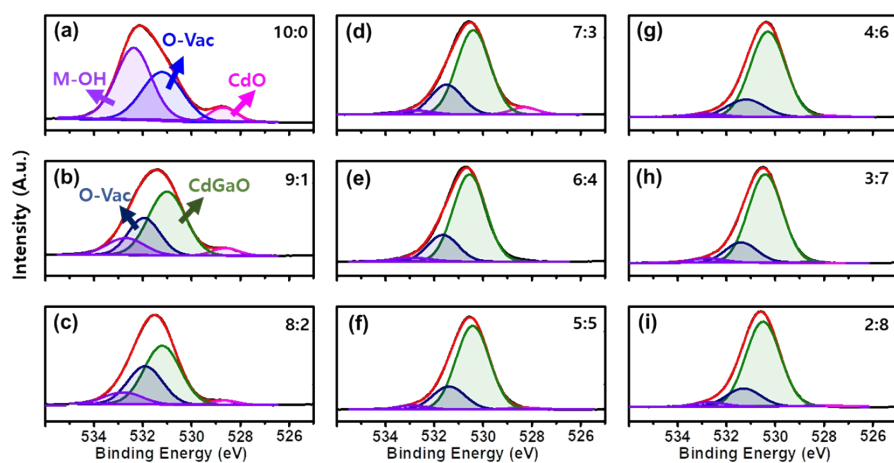

**Figure S6.** XPS O 1s analysis of CdGaO thin films annealed at 500 °C with Cd:Ga ratios of a) 10:0, b) 9:1, c) 8:2 d) 7:3, e) 6:4, f) 5:5, g) 4:6, h) 3:7, and i) 2:8 after surface sputtering.

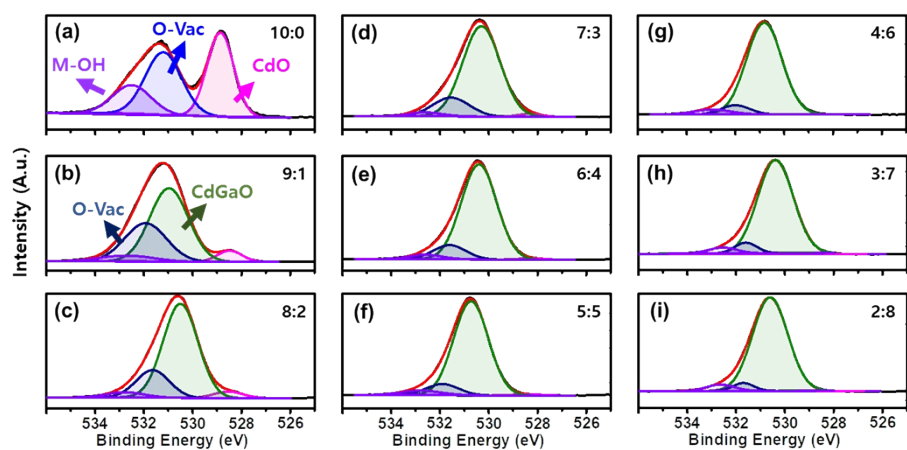

**Figure S7.** XPS O 1s analysis of CdGaO thin films annealed at 350 °C with Cd:Ga ratios of a) 10:0, b) 9:1, c) 8:2 d) 7:3, e) 6:4, f) 5:5, g) 4:6, h) 3:7, and i) 2:8 after surface sputtering.

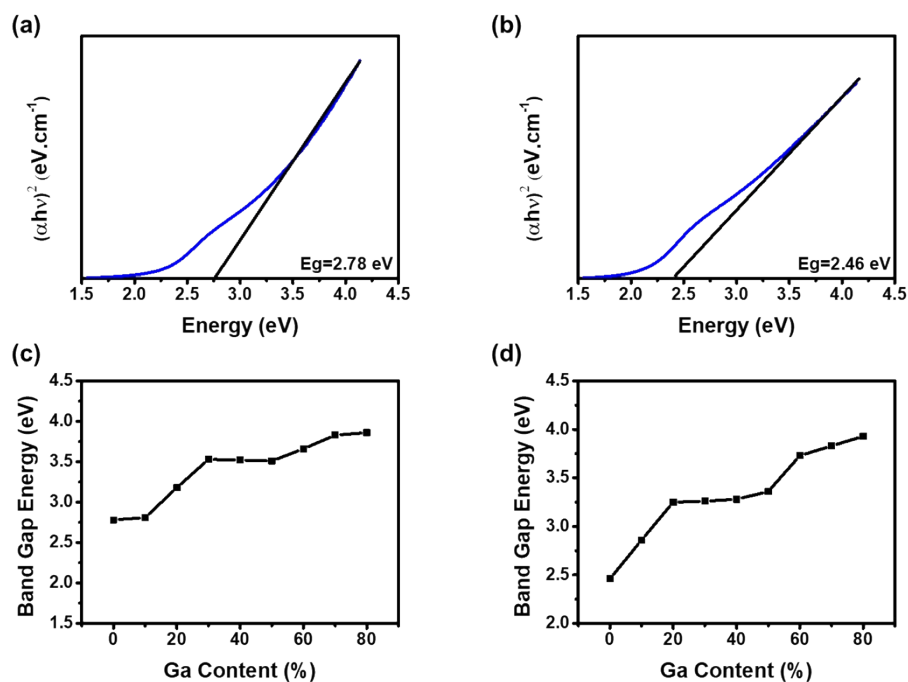

**Figure S8.** Tauc plots of CdO thin films annealed at a) 500 and b) 350 °C, and bandgap value of CdGaO thin films as a function of the amount of Ga incorporated, with ratios ranging from 10:0 to 2:8 for films annealed at c) 500 and d) 350 °C.

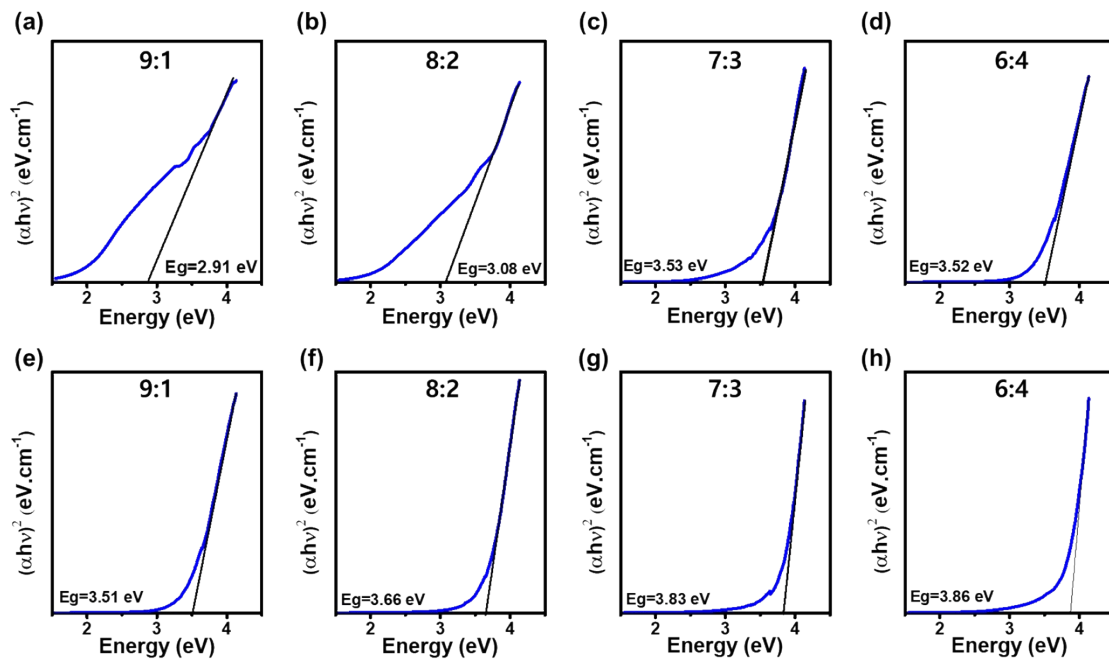

**Figure S9.** Tauc plots of CdGaO thin films with Cd/Ga ratios ranging from 9:1 to 2:8, annealed at 500 °C.

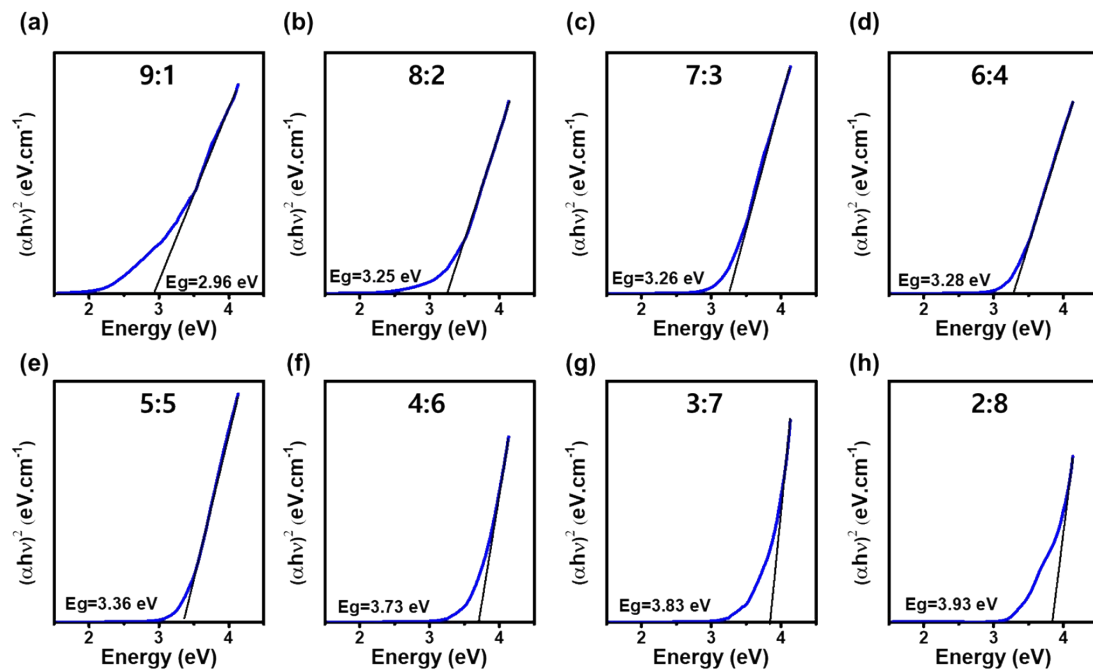

**Figure S10.** Tauc plots of CdGaO thin films with Cd/Ga ratios ranging from 9:1 to 2:8, annealed at 350 °C.

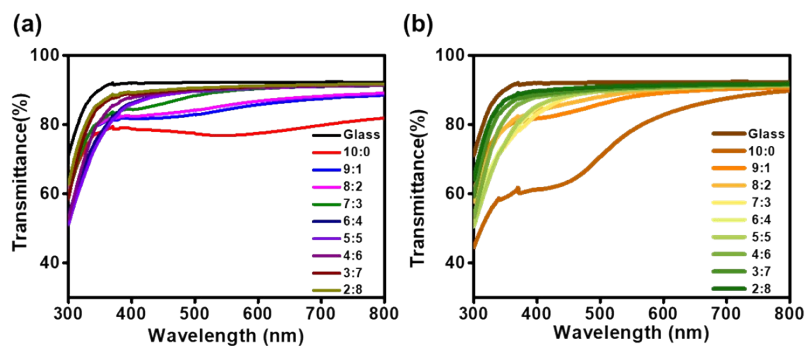

**Figure S11.** UV-vis spectra of CdGaO-based thin films with compositional ratios ranging from 10:0 to 2:8, annealed at a) 500 and b) 350 °C.

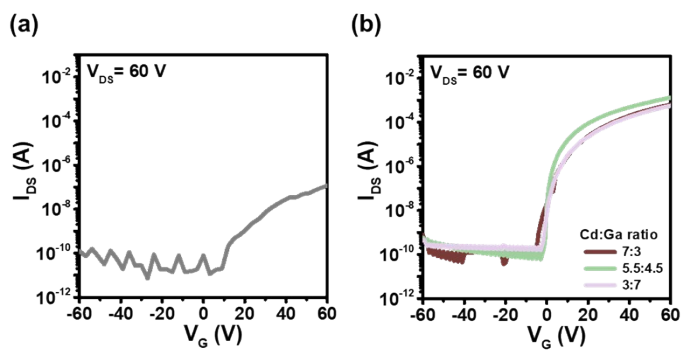

**Figure S12.** a) Transfer characteristics of the CdO-based TFT, annealed at 350 °C. b) Transfer characteristics of the CdGaO-based TFT with Cd/Ga ratios ranging from 7:3 to 3:7, annealed at 350 °C.

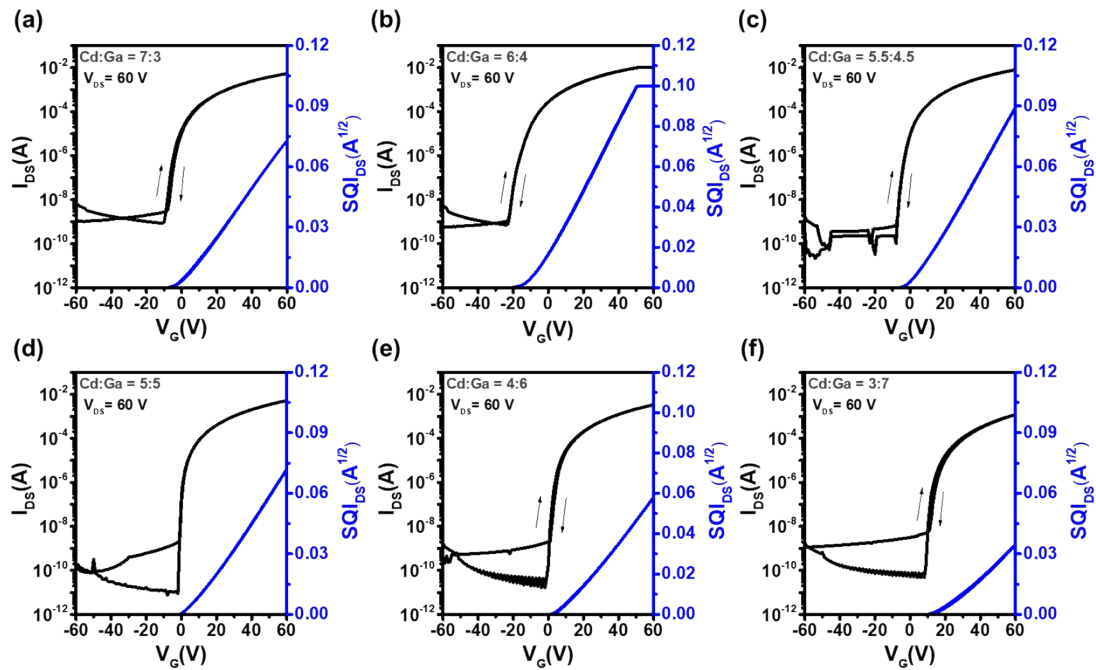

**Figure S13.** Transfer curves of the CdGaO TFT with Cd:Ga ratios ranging from 7:3 to 3:7, annealed at 500 °C.

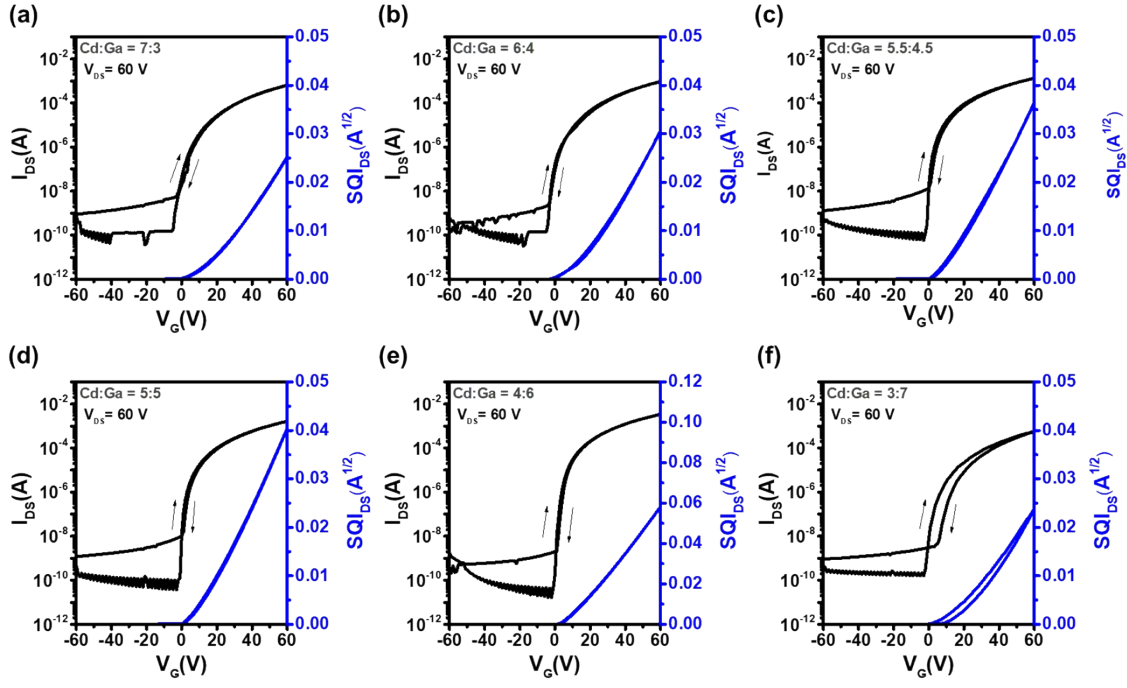

**Figure S14.** Transfer curves of the CdGaO TFT with Cd:Ga ratios ranging from 7:3 to 3:7, annealed at 350 °C.

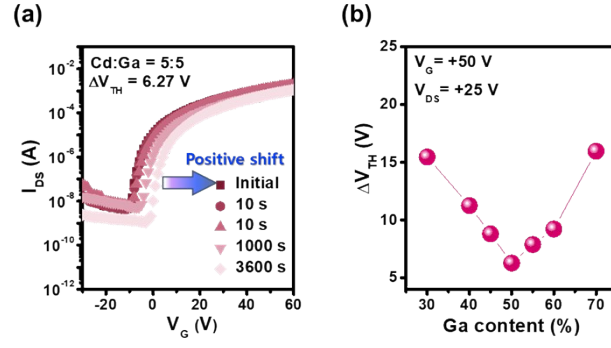

**Figure S15.** a) Transfer characteristics of the optimized  $a\text{-Cd}_5\text{Ga}_5\text{O}_{12.5}$  TFT under positive bias stress ( $V_G = 50 \text{ V}$ ;  $V_{DS} = 25 \text{ V}$ ) for 3600 s annealed at  $350^\circ\text{C}$ . b) Threshold voltage shift value of the  $a\text{-CdGaO}$ -based TFT with Cd/Ga ratios ranging from 7:3 to 3:7 under above-mentioned positive bias stress, annealed at  $350^\circ\text{C}$ .

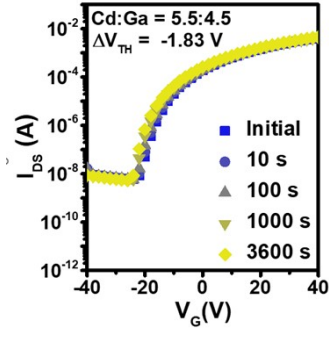

**Figure S16.** Transfer characteristics of the optimized  $a$ -Cd<sub>5.5</sub>Ga<sub>4.5</sub>O<sub>12.25</sub> TFT under negative bias stress ( $V_G = -50$  V;  $V_{DS} = 25$  V) for 3600 s, annealed at 500 °C.

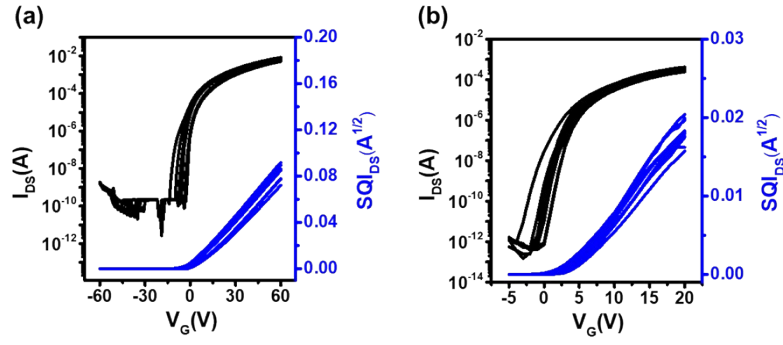

**Figure S17.** Transfer curves of optimized  $a\text{-Cd}_{5.5}\text{Ga}_{4.5}\text{O}_{12.25}$  TFTs annealed at 500 °C on a)  $\text{SiO}_2$  with simple wet etching and b) glass substrate with solution-processed alumina as dielectric obtained via the standard lithography patterning process.

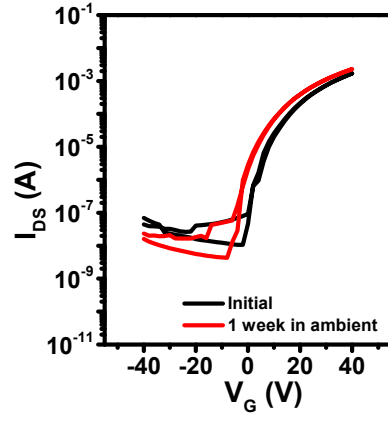

**Figure 18.** Transfer characteristics of the optimized  $\alpha$ -Cd<sub>5.5</sub>Ga<sub>4.5</sub>O<sub>12.25</sub> TFT annealed at 500°C : Comparison before and after one week exposure to ambient air.

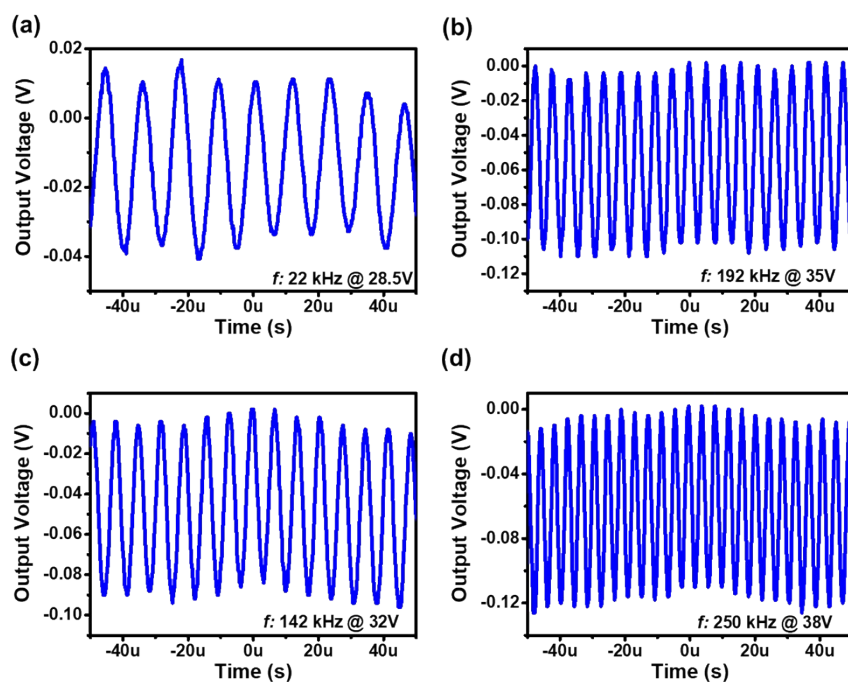

**Figure S19.** Output waveform of the seven-stage ring oscillator operating with supply voltages of a) 28.5, b) 32, c) 35, and d) 38 V and the optimized  $a\text{-Cd}_{5.5}\text{Ga}_{4.5}\text{O}_{12.25}$  TFT.
